# Supplementary material for: Fluid velocity based simulation of hydraulic fracture—a penny shaped model. Part II: new, accurate semi-analytical benchmarks for an impermeable solid
Source: Springer Nature journal article supplement (doi:10.1007/s11012-018-0903-6), 2018-10-24
Supplement: MOESM1 [file 16224368]

Fluid velocity based simulation of hydraulic fracture - a penny  
shaped model. Part II: New, accurate semi-analytical  
benchmarks for an impermeable solid  
Supplementary material

D. Peck, M. Wrobel, M. Perkowska, G. Mishuris

## 1 Coefficients of the approximate solutions

For any value of the fluid behaviour index  $n$  and self-similar material toughness  $\hat{K}_I$ , the self-similar crack propagation speed  $\hat{v}_0$  is given in the form (24)<sub>1</sub>. The values of respective coefficients  $C_i$  are provided in Table S1 for  $\hat{K}_I = \{0, 1, 10\}$ .

| $\hat{K}_I$ | $C_0$                    | $C_1$                     | $C_2$                     | $C_3$                     |
|-------------|--------------------------|---------------------------|---------------------------|---------------------------|
| 0           | 0.1314342                | 0.1210766                 | -0.0781383                | 0.031537                  |
| 1           | 0.06125898               | 0.050859704               | -0.029318586              | 0.012385442               |
| 10          | $7.04065 \times 10^{-3}$ | $3.602954 \times 10^{-3}$ | $-2.00895 \times 10^{-3}$ | $1.373533 \times 10^{-3}$ |

| $\hat{K}_I$ | $C_4$                       | $C_5$                       | $C_6$                      | $C_7$                       |
|-------------|-----------------------------|-----------------------------|----------------------------|-----------------------------|
| 0           | $-5.293135 \times 10^{-3}$  | $-6.62796 \times 10^{-3}$   | $5.350374 \times 10^{-3}$  | $-1.521311 \times 10^{-3}$  |
| 1           | $-2.920989 \times 10^{-3}$  | $-2.8172727 \times 10^{-4}$ | $4.8397784 \times 10^{-4}$ | $-1.2631848 \times 10^{-4}$ |
| 10          | $-1.0841455 \times 10^{-3}$ | $7.441777 \times 10^{-4}$   | $-3.330152 \times 10^{-4}$ | $6.79385 \times 10^{-5}$    |

Table S1: Values of the coefficients  $C_i$  used to approximate  $\hat{v}_0$  (24) for different values of the fracture toughness.

Meanwhile, the coefficients of the constant  $\hat{C}_p(n)$ , which takes the form (24)<sub>2</sub> in the viscosity dominated case ( $\hat{K}_{Ic} = 0$ ), are provided in Table S2.

The remaining coefficients for the fracture aperture, pressure and fluid velocity approximations are outlined for different values of the fracture toughness below.

| $D_0$  | $D_1$   | $X_0$ | $X_1$   | $X_2$   | $X_3$ |
|--------|---------|-------|---------|---------|-------|
| 3.5484 | -3.1946 | 3.711 | -1.3516 | -3.3625 | 1     |

Table S2: Values of the coefficients  $D_i, X_k$  used to approximate the constant  $\hat{C}_p(n)$  in equation (24)<sub>2</sub>.

### 1.1 Viscosity dominated regime ( $\hat{K}_{Ic} = 0$ )

In the general case  $0 < n < 1$  the coefficients of approximation for the aperture (21), fluid velocity (22) and pressure (23) are given as:

$$\mathcal{Z}(n) = \frac{\sum_{k=0}^5 r_k n^k}{(1-n)^\kappa \sum_{k=0}^5 s_k n^k}, \quad (\text{S1})$$

with the values of  $r_k, s_k$  and  $\kappa$  for the case  $0 < n < 1$  being listed in Tables S3 and S4.

In the case of a Newtonian fluid  $n = 1$  the coefficients used to approximate the aperture (21) and the fluid velocity (22) remain the same as in the general case. The coefficients of the pressure approximation (42) are now given by:

$$p_1 = -0.0715, \quad p_2 = -0.22233, \quad p_3 = 114.7455, \quad (\text{S2})$$

$$p_4 = 0.0413, \quad p_5 = -0.12312, \quad p_6 = -0.0237.$$

For the perfectly plastic fluid  $n = 0$  the coefficients used to approximate the aperture (21), fluid velocity (46) and pressure (47) are as follows:

$$w_0 = 1.773, \quad w_1 = 0.06, \quad w_2 = -0.1638, \quad w_3 = 0.335,$$

$$w_4 = -0.289, \quad w_5 = -0.179, \quad w_6 = 0.6607,$$

$$v_1 = 4.8656, \quad v_2 = 1.703, \quad v_3 = -20.484, \quad v_4 = 51.4, \quad v_5 = 18.07, \quad (\text{S3})$$

$$p_1 = -0.5921, \quad p_2 = 0.28201, \quad p_3 = 0.264, \quad p_4 = 0.127,$$

$$p_5 = 0.099, \quad p_6 = -0.6436, \quad p_7 = 0.3806.$$

### 1.2 Toughness dominated regime with $\hat{K}_I = 1$

In the general case  $0 < n < 1$  the approximation coefficients for the aperture (29), fluid velocity (30) and pressure (31) are given in the form:

$$\mathcal{Z}(n) = \frac{\sum_{k=0}^7 r_k n^k}{\sum_{k=0}^5 s_k n^k}, \quad (\text{S4})$$

with the values of  $r_k, s_k$  for the case  $0 < n < 1$  being listed in Tables S5 and S6.

For the Newtonian fluid  $n = 1$  the coefficients for the approximate pressure function (43) are now given by:

$$p_1 = 0.90064, \quad p_2 = 9.053 \times 10^{-3}, \quad p_3 = -0.0126243, \quad p_4 = -7.3525 \times 10^{-4}, \quad (\text{S5})$$

while those for the aperture (29) and fluid velocity (30) remain the same as in the general case.

| $\mathcal{Z}(n)$ | $r_0$      | $r_1$      | $r_2$      | $r_3$      | $r_4$                     | $r_5$    |
|------------------|------------|------------|------------|------------|---------------------------|----------|
| $w_0$            | 1.087913   | 0.629465   | 0.1884191  | -0.0954601 | 0.0539965                 | 0        |
| $w_1$            | 0.0731578  | -0.0940037 | -0.2924713 | 0.712854   | -0.220774                 | 0        |
| $w_2$            | -0.0813068 | 0.1374238  | -0.0672009 | -0.0557795 | 0                         | 0        |
| $w_3$            | 0.1130671  | -0.458432  | -0.549883  | 0          | 0                         | 0        |
| $w_4$            | -0.3394015 | 1.968425   | -0.324536  | 0          | 0                         | 0        |
| $w_5$            | -0.4207775 | 2.729404   | 0          | 0          | 0                         | 0        |
| $w_6$            | 0.374811   | -0.595337  | 0.4492     | 0.0240865  | 0                         | 0        |
| $v_1$            | -0.0618879 | 0.238355   | 0.488614   | -0.089777  | 0                         | 0        |
| $v_2$            | 0.106085   | -0.0105322 | -0.43386   | -0.0150819 | 0                         | 0        |
| $v_3$            | 0.0260021  | 0.0203881  | -0.0379568 | 0.0258418  | $-6.69655 \times 10^{-3}$ | 0        |
| $v_4$            | -0.0127769 | -0.0152235 | 0.0201527  | 0          | 0                         | 0        |
| $p_1$            | -1.383     | 0.6689     | 0          | 0          | 0                         | 0        |
| $p_2$            | -18.738    | -7.314     | 7.802      | 0          | 0                         | 0        |
| $p_3$            | 9.470147   | -26.2166   | 23.92346   | -7.16925   | 0                         | 0        |
| $p_4$            | 0.1491     | -0.09304   | -0.13218   | 0.16745    | -0.12976                  | 0.07958  |
| $p_5$            | -0.0754673 | -0.463258  | 1.755936   | -1.882529  | 0.732565                  | -0.05901 |
| $p_6$            | -27.292    | -94.974    | 111.858    | 0          | 0                         | 0        |

Table S3: The values of coefficients  $r_i$  used in approximation (S1) in the general case  $0 < n < 1$  with  $\hat{K}_I = 0$ .

| $\mathcal{Z}(n)$ | $s_0$                     | $s_1$      | $s_2$      | $s_3$     | $s_4$    | $s_5$ | $\kappa$ |
|------------------|---------------------------|------------|------------|-----------|----------|-------|----------|
| $w_0$            | 0.613792                  | 1          | 0          | 0         | 0        | 0     | 0        |
| $w_1$            | 1.30785                   | -1.57716   | 0.820255   | 1         | 0        | 0     | 0        |
| $w_2$            | 0.504215                  | -0.2551376 | -0.436244  | 1         | 0        | 0     | 0        |
| $w_3$            | 0.2952694                 | 0.319092   | -0.2805504 | 0.0738782 | 1        | 0     | 0        |
| $w_4$            | 1.022663                  | 0.28412    | -1.162825  | 1.77880   | 1        | 0     | 0        |
| $w_5$            | 2.02325                   | -0.427459  | -1.46776   | 3.51378   | 1        | 0     | 0        |
| $w_6$            | 0.57009                   | -1.09863   | 1          | 0         | 0        | 0     | 0        |
| $v_1$            | $-3.3351 \times 10^{-6}$  | 2.37989    | 1          | 0         | 0        | 0     | 0        |
| $v_2$            | $-5.84509 \times 10^{-6}$ | 4.0795     | 2.2347     | 1         | 0        | 0     | 0        |
| $v_3$            | $-2.50863 \times 10^{-6}$ | 1          | 0          | 0         | 0        | 0     | 0        |
| $v_4$            | 1.75635                   | 0.685504   | 1          | 0         | 0        | 0     | 0        |
| $p_1$            | 2.3357                    | 4.248      | 2.4022     | 1         | 0        | 0     | 1        |
| $p_2$            | 0                         | 33.212     | 47.87      | 1         | 0        | 0     | 0        |
| $p_3$            | 16.78564                  | -30.8988   | 8.118      | 9.44912   | -4.39755 | 1     | 0        |
| $p_4$            | 1                         | 0          | 0          | 0         | 0        | 0     | 0        |
| $p_5$            | 0.133757                  | 0.959086   | -2.15943   | 1         | 0        | 0     | 0        |
| $p_6$            | 495.12                    | 686.2      | -734.6     | 1         | 0        | 0     | 0        |

Table S4: The values of coefficients  $s_i$  and  $\kappa$  used in approximation (S1) in the general case  $0 < n < 1$  with  $\hat{K}_I = 0$ .

In the case of a perfectly plastic fluid  $n = 0$  the coefficients used to approximate the aperture (48) and fluid velocity (46) are as follows:

$$\begin{aligned} w_1 &= 0.20403, & w_2 &= -0.073008, & w_3 &= -0.65676, & w_4 &= -0.6802, & w_5 &= 0.14507, \\ v_1 &= 0.061258, & v_2 &= 9.584 \times 10^{-4}, & v_3 &= -4.939 \times 10^{-3}, & v_4 &= -4.12 \times 10^{-3}, \end{aligned} \quad (\text{S6})$$

while those for the pressure function (31) remain the same as in the general case.

### 1.3 Toughness dominated regime with $\hat{K}_I = 10$

In the general case  $0 < n < 1$  the approximation coefficients for the aperture (29), fluid velocity (30) and pressure (31) are given in the form:

$$\mathcal{Z}(n) = \frac{\sum_{k=0}^6 r_k n^k}{\sum_{k=0}^5 s_k n^k}, \quad (\text{S7})$$

with the values of  $r_k, s_k$  for the case  $0 < n < 1$  being listed in Tables S7 and S8.

For a Newtonian fluid  $n = 1$  the coefficients for the approximate pressure function (43) are now given by:

$$p_1 = 8.86228, \quad p_2 = 9.23151 \times 10^{-6}, \quad p_3 = -1.384716 \times 10^{-5}, \quad p_4 = -8.6771 \times 10^{-11}, \quad (\text{S8})$$

while those for the aperture (29) and fluid velocity (30) remain the same as in the general case.

Finally, in the case of a perfectly plastic fluid  $n = 0$  the coefficients used to approximate the aperture (48) and fluid velocity (46) are as follows:

$$\begin{aligned} w_1 &= 2.2352 \times 10^{-3}, & w_2 &= -7.2 \times 10^{-4}, & w_3 &= -6.893 \times 10^{-3}, \\ w_4 &= -7.137 \times 10^{-3}, & w_5 &= 1.843 \times 10^{-3}, \\ v_1 &= 7.040647 \times 10^{-3}, & v_2 &= 2.8 \times 10^{-7}, & v_3 &= -8.3 \times 10^{-6}, & v_4 &= -8.4 \times 10^{-6}, \end{aligned} \quad (\text{S9})$$

while those for the pressure function (31) remain the same as in the general case.

| $\mathcal{Z}(n)$ | $r_0$                     | $r_1$                      | $r_2$                     | $r_3$                      | $r_4$                     | $r_5$                     | $r_6$      |
|------------------|---------------------------|----------------------------|---------------------------|----------------------------|---------------------------|---------------------------|------------|
| $w_1$            | 0.01306626                | 0.0775474                  | -0.05721985               | -0.0640863                 | 0.082593                  | -0.01774346               | 0          |
| $w_2$            | 0.0878826                 | -0.1161146                 | 0.232977                  | -0.2632192                 | 0                         | 0                         | 0          |
| $w_3$            | -0.02452076               | -0.0963696                 | 0.465517                  | -0.768842                  | 0.916261                  | -0.76577                  | 0.376085   |
| $w_4$            | $1.044817 \times 10^{-3}$ | -0.0625069                 | 0.0359431                 | $1.138043 \times 10^{-3}$  | $-4.5913 \times 10^{-3}$  | 0                         | 0          |
| $w_5$            | 0.1573167                 | -0.383264                  | 0.240315                  | -0.1076469                 | 0.1434914                 | -0.126323                 | 0.03972025 |
| $v_1$            | $-5.33568 \times 10^{-3}$ | 0.0490222                  | 0.1536204                 | 0.1200713                  | $2.598823 \times 10^{-3}$ | 0                         | 0          |
| $v_2$            | $1.116405 \times 10^{-3}$ | $-1.752448 \times 10^{-3}$ | $9.66676 \times 10^{-4}$  | $-1.993698 \times 10^{-4}$ | 0                         | 0                         | 0          |
| $v_3$            | $5.16309 \times 10^{-3}$  | $-3.942155 \times 10^{-3}$ | $2.435618 \times 10^{-3}$ | 0                          | 0                         | 0                         | 0          |
| $v_4$            | $8.42106 \times 10^{-3}$  | $-4.082466 \times 10^{-3}$ | -0.0754209                | 0.01562056                 | -0.01000874               | $2.352954 \times 10^{-3}$ | 0          |
| $p_1$            | 13.254                    | -13.317                    | 0                         | 0                          | 0                         | 0                         | 0          |
| $p_2$            | -0.1896                   | 0.368634                   | -0.17891                  | 0                          | 0                         | 0                         | 0          |
| $p_3$            | 2.85655                   | -3.3178                    | 0.96667                   | 0                          | 0                         | 0                         | 0          |
| $p_4$            | -1.41826                  | 1.60526                    | -0.500383                 | 0                          | 0                         | 0                         | 0          |

Table S5: The values of coefficients  $r_1, \dots, r_6$  used in approximation (S4) in the general case  $0 < n < 1$  with  $\hat{K}_I = 1$ .

| $Z(n)$ | $r_7$      | $s_0$                      | $s_1$                     | $s_2$      | $s_3$    | $s_4$     | $s_5$ |
|--------|------------|----------------------------|---------------------------|------------|----------|-----------|-------|
| $w_1$  | 0          | 0                          | $-7.11987 \times 10^{-5}$ | 0.5363626  | 1        | 0         | 0     |
| $w_2$  | 0          | $-1.036047 \times 10^{-3}$ | 7.22007                   | -2.613708  | 12.86834 | -5.560094 | 1     |
| $w_3$  | -0.0811716 | 0                          | 0                         | 1          | 0        | 0         | 0     |
| $w_4$  | 0          | 1                          | 0                         | 0          | 0        | 0         | 0     |
| $w_5$  | 0          | 1                          | 0                         | 0          | 0        | 0         | 0     |
| $v_1$  | 0          | $1.128027 \times 10^{-5}$  | 0.891702                  | 1.62677    | 1        | 0         | 0     |
| $v_2$  | 0          | $-1.066292 \times 10^{-5}$ | 0.865467                  | 1.724926   | 1.837862 | 1         | 0     |
| $v_3$  | 0          | $3.128464 \times 10^{-5}$  | 0.861807                  | 0.02594735 | 1.430577 | -0.703677 | 1     |
| $v_4$  | 0          | $-9.85603 \times 10^{-6}$  | 1.79581                   | 1          | 0        | 0         | 0     |
| $p_1$  | 0          | 14.6064                    | -11.804                   | -7.0187    | 7.3799   | -4.1367   | 1     |
| $p_2$  | 0          | 5.4791                     | 4.8663                    | -4.7430    | -1.34197 | -4.34704  | 1     |
| $p_3$  | 0          | 6.47756                    | 5.5563                    | -5.9133    | -2.0187  | -5.0902   | 1     |
| $p_4$  | 0          | 4.14283                    | 5.2029                    | -1.85248   | -2.80587 | -5.6837   | 1     |

Table S6: The values of coefficients  $r_7$  and  $s_k$  used in approximation (S4) in the general case  $0 < n < 1$  with  $\hat{K}_I = 1$ .

| $\mathcal{Z}(n)$ | $r_0$                      | $r_1$                      | $r_2$                      | $r_3$                     | $r_4$                     | $r_5$                     | $r_6$                     |
|------------------|----------------------------|----------------------------|----------------------------|---------------------------|---------------------------|---------------------------|---------------------------|
| $w_1$            | $2.091489 \times 10^{-5}$  | $-2.17337 \times 10^{-5}$  | 0                          | 0                         | 0                         | 0                         | 0                         |
| $w_2$            | $1.576727 \times 10^{-5}$  | $-2.197917 \times 10^{-5}$ | 0                          | 0                         | 0                         | 0                         | 0                         |
| $w_3$            | $-1.305999 \times 10^{-5}$ | $1.981974 \times 10^{-5}$  | 0                          | 0                         | 0                         | 0                         | 0                         |
| $w_4$            | $9.1626 \times 10^{-6}$    | $-7.9008 \times 10^{-4}$   | $3.71779 \times 10^{-3}$   | $-7.84178 \times 10^{-3}$ | $8.92224 \times 10^{-3}$  | $-5.33619 \times 10^{-3}$ | $1.315743 \times 10^{-3}$ |
| $w_5$            | $1078013 \times 10^{-4}$   | $-8.97955 \times 10^{-4}$  | $1.822423 \times 10^{-4}$  | 0                         | 0                         | 0                         | 0                         |
| $v_1$            | $-9.10529 \times 10^{-6}$  | $6.74877 \times 10^{-3}$   | 0.02089243                 | 0.01419788                | $-2.20858 \times 10^{-5}$ | 0                         | 0                         |
| $v_2$            | $3.9550128 \times 10^{-8}$ | $3.298671 \times 10^{-8}$  | $-2.0487 \times 10^{-7}$   | 0                         | 0                         | 0                         | 0                         |
| $v_3$            | $8.61754 \times 10^{-7}$   | $-1.455384 \times 10^{-6}$ | $6.6048 \times 10^{-7}$    | 0                         | 0                         | 0                         | 0                         |
| $v_4$            | $1.769907 \times 10^{-4}$  | $-1.483712 \times 10^{-3}$ | $-0.0455816$               | 0                         | 0                         | 0                         | 0                         |
| $p_1$            | 0.884925                   | 3.86403                    | 8.86889                    | $-3.30243 \times 10^{-3}$ | 0                         | 0                         | 0                         |
| $p_2$            | $-1.323758 \times 10^{-4}$ | $2.79849 \times 10^{-4}$   | $-1.506993 \times 10^{-4}$ | 0                         | 0                         | 0                         | 0                         |
| $p_3$            | 0.02033428                 | -0.0862176                 | 0.1551598                  | -0.1360064                | 0.0477962                 | 0                         | 0                         |
| $p_4$            | -0.0165688                 | 0.0751266                  | -0.142603                  | 0.1293825                 | -0.0461426                | 0                         | 0                         |

Table S7: The values of coefficients  $r_k$  used in approximation (S7) in the general case  $0 < n < 1$  with  $\hat{K}_I = 10$ .



| $\mathcal{Z}(n)$ | $s_0$                     | $s_1$                      | $s_2$     | $s_3$      | $s_4$    | $s_5$ |
|------------------|---------------------------|----------------------------|-----------|------------|----------|-------|
| $w_1$            | $4.622623 \times 10^{-5}$ | $-1.900085 \times 10^{-3}$ | 0.1066525 | -0.1166793 | 1        | 0     |
| $w_2$            | $1.722383 \times 10^{-3}$ | 0.06665135                 | 1         | 0          | 0        | 0     |
| $w_3$            | $6.52219 \times 10^{-5}$  | $-2.700796 \times 10^{-3}$ | 0.0875316 | -0.2049092 | 1        | 0     |
| $w_4$            | 1                         | 0                          | 0         | 0          | 0        | 0     |
| $w_5$            | 0.0569477                 | 0.1781103                  | 1         | 0          | 0        | 0     |
| $v_1$            | $4.40059 \times 10^{-4}$  | 0.950784                   | 2.494946  | 1          | 0        | 0     |
| $v_2$            | $2.3357 \times 10^{-3}$   | -0.0486563                 | 1         | 0          | 0        | 0     |
| $v_3$            | $3.87371 \times 10^{-5}$  | 0.0666403                  | 0.369115  | 0.686029   | 1.67268  | 1     |
| $v_4$            | 0.034835                  | 14.4869                    | 3.31537   | 4.40656    | -3.29718 | 1     |
| $p_1$            | 0.0997469                 | 0.436514                   | 1         | 0          | 0        | 0     |
| $p_2$            | 0.03608244                | 0.1856344                  | 0.3893436 | 1          | 0        | 0     |
| $p_3$            | 0.4682724                 | 1                          | 0         | 0          | 0        | 0     |
| $p_4$            | 0.382409                  | 1                          | 0         | 0          | 0        | 0     |

Table S8: The values of coefficients  $s_k$  used in approximation (S7) in the general case  $0 < n < 1$  with  $\hat{K}_J = 10$ .
